# Supplementary material for: Cancer gene profiling in non-small cell lung cancers reveals activating mutations in JAK2 and JAK3 with therapeutic implications
Source: PubMed Central journal article supplement (PMC5662094; doi:10.1186/s13073-017-0478-1), 2017-10-30

**Figure S1**

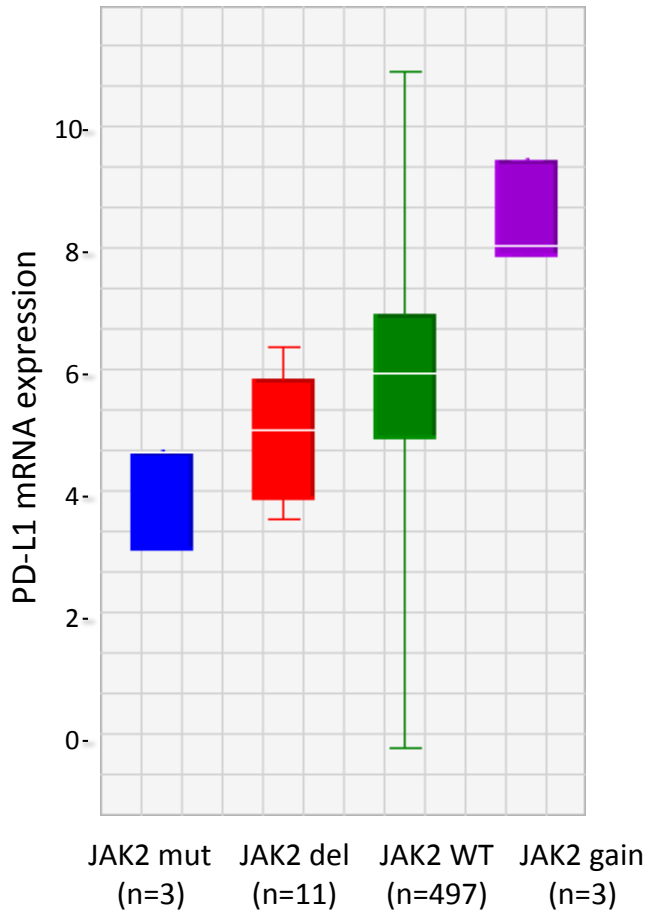

Figure S2

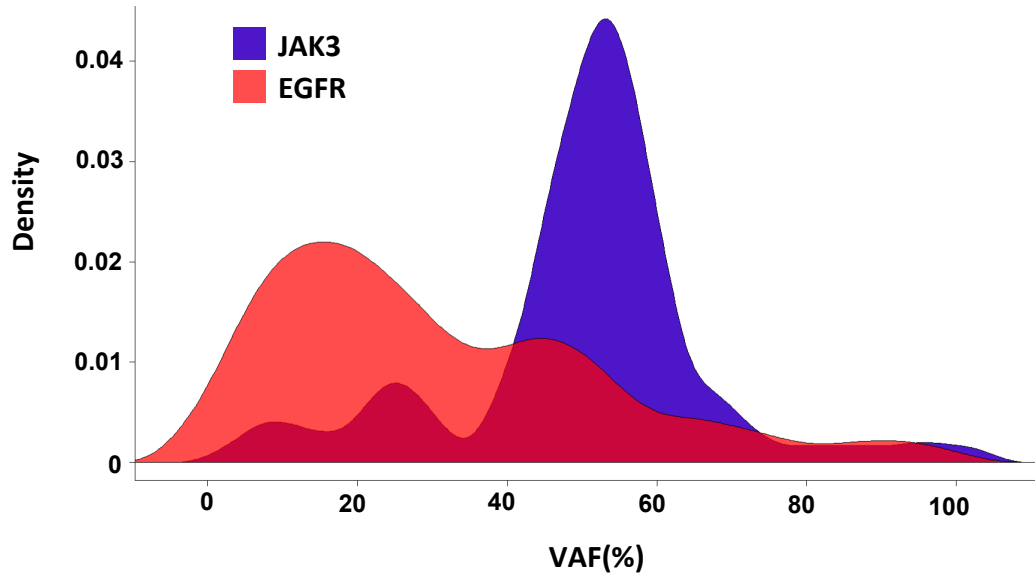

Supplement: 13073_2017_478_MOESM2_ESM.pdf [file 13073_2017_478_MOESM2_ESM.pdf]
